# Supplementary material for: Stabilizing the surface of Ni-rich cathodes via facing-target sputtering for high-performance lithium-ion batteries
Source: Royal Society of Chemistry journal article supplement (doi:10.1039/d2ta07322f), 2022-01-01
Supplement: d2ta07322f1.pdf [file d2ta07322f1.pdf]

## Supplementary Information

# Stabilizing Surface of Ni-Rich Cathode via Facing-Target Sputtering for High-Performance Lithium-Ion Batteries

*Jong Heon Kim<sup>a,b,1</sup>, Jun-Seob Park<sup>a,1</sup>, Su-Ho Cho<sup>b,1</sup>, Ji-Min Park<sup>a</sup>, Jong Seok Nam<sup>c</sup>, Soon-Gil Yoon<sup>a</sup>, Il-Doo Kim<sup>c,\*</sup>, Ji-Won Jung<sup>d,\*</sup> and Hyun-Suk Kim<sup>a,\*</sup>*

<sup>a</sup> Department of Materials Science and Engineering, Chungnam National University, Daejeon 34134, Republic of Korea

<sup>b</sup> Texas Materials Institute and Materials Science and Engineering Program, The University of Texas at Austin, TX 78712, Austin, USA

<sup>c</sup> Department of Materials Science and Engineering, Korea Advanced Institute of Science and Technology (KAIST), 291 Daehak-ro, Yuseong-Gu, Daejeon, 34141, Republic of Korea

<sup>d</sup> School of Materials Science and Engineering, University of Ulsan, Techno saneop-ro 55 beon-gil, Nam-gu, Ulsan 44776, Republic of Korea

**Corresponding Author\*:** Prof. Hyun-Suk Kim, Prof. Ji-Won Jung, Prof. Il-Doo Kim

**Email Address:** khs3297@cnu.ac.kr, jwjung4@ulsan.ac.kr & idkim@kaist.ac.kr

## Figure Captions

**Fig. S1.** EDS mapping for elements of (a) A(3)-NCM and (b) F(3)-NCM for Ni (sky blue), Co (Green), and Mn (Purple).

**Fig. S2.** XPS data of P-NCM, A(3)-NCM, and F(3)-NCM for the (a-c) Li 1s and (d-f) O 1s core-level spectra.

**Fig. S3.** XPS analysis of P-NCM, A(3)-NCM, and F(3)-NCM for the (a) Ni 2p, (b) Co 2p and (c) Mn 2p.

**Fig. S4.** Nyquist plots of P-NCM, A-NCM and F-NCM, presented with fitted curves.

**Fig. S5** (a) Rate capability, (b) Electrochemical impedance spectroscopy data, and (c) Cycling performance of A(1)-NCM, and A(5)-NCM.

**Fig. S6** (a) Rate capability, (b) Electrochemical impedance spectroscopy data, and (c) Cycling performance of F(1)-NCM, and F(5)-NCM.

**Fig. S7.** XPS data of P-NCM, A(3)-NCM, and F(3)-NCM for the (a-c) Li 1s and (d-f) O 1s core-level spectra after 100 cycles.

**Fig. S8.** XPS analysis of P-NCM, A(3)-NCM, and F(3)-NCM for the (a) Ni 2p, (b) Co 2p and (c) Mn 2p after 100 cycles.

**Fig. S9.** TEM images of (a) A(3)-NCM and (b) F(3)-NCM, EDS mapping for elements of A(3)-NCM and F(3)-NCM for Al (Red), Ni (Sky blue), Co (Green), and Mn (Purple).

**Fig. S10.** ToF-SIMS profiles of (A) P-NCM, (B) A(3)-NCM, and (C) F(3)-NCM after 100 cycles.

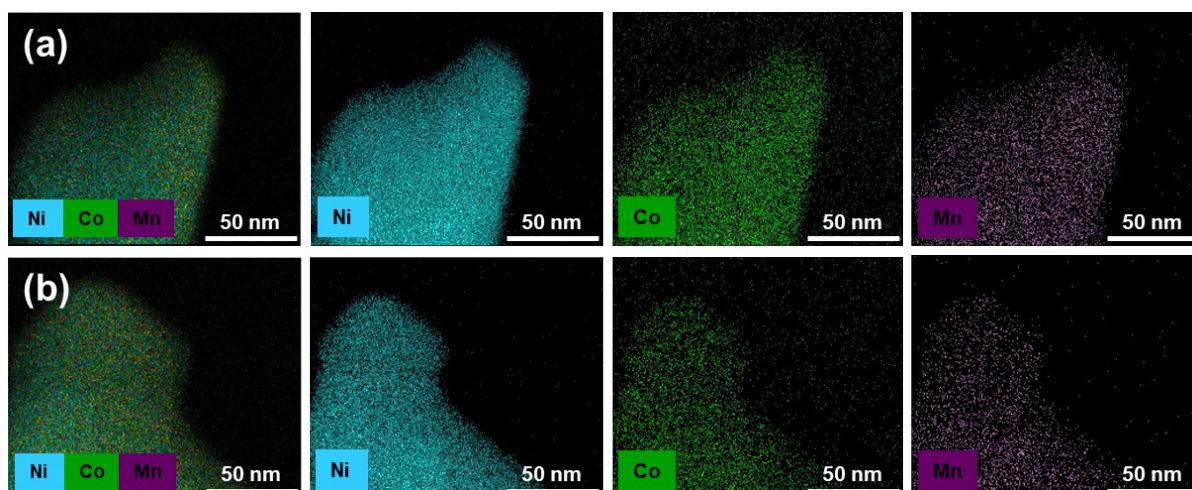

**Fig. S1** EDS mapping for elements of (a) A(3)-NCM and (b) F(3)-NCM for Ni (Sky blue), Co (Green), and Mn (Purple).

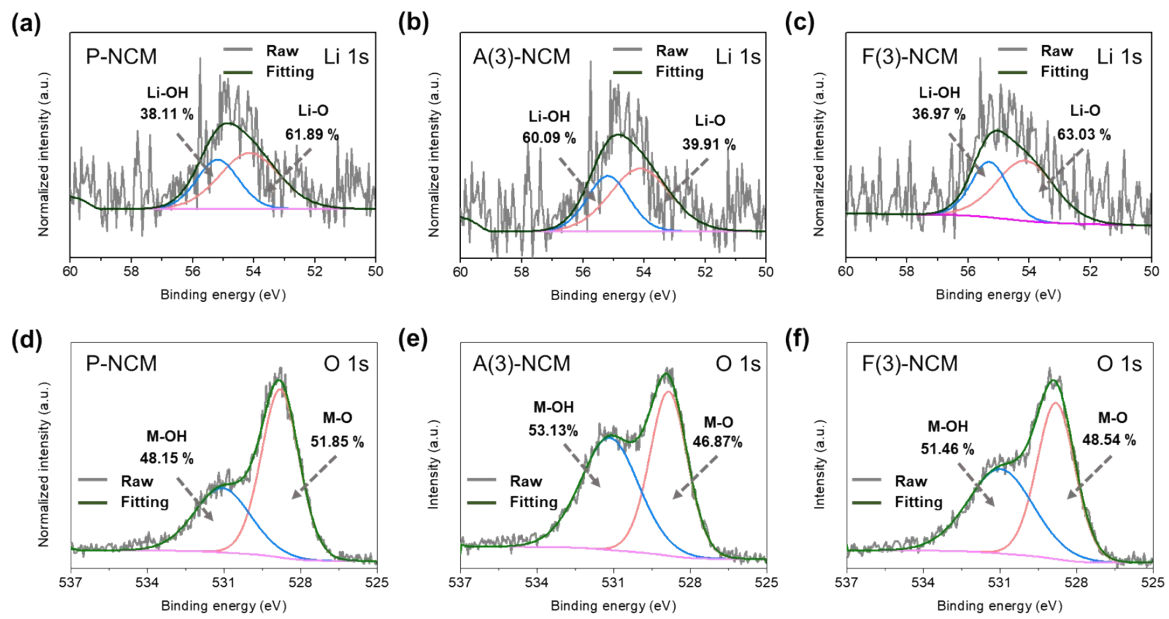

**Fig. S2** XPS data of P-NCM, A(3)-NCM, and F(3)-NCM for the (a-c) Li 1s and (d-f) O 1s core-level spectra.

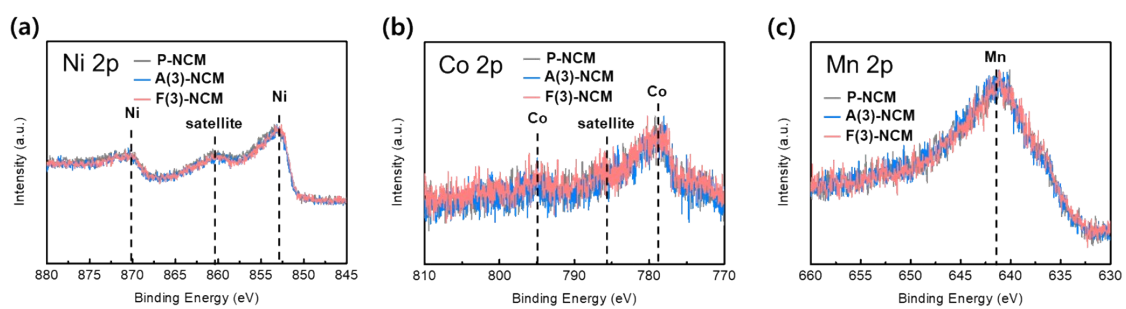

**Fig. S3** XPS analysis of P-NCM, A(3)-NCM, and F(3)-NCM for the (a) Ni 2p, (b) Co 2p and (c) Mn 2p.

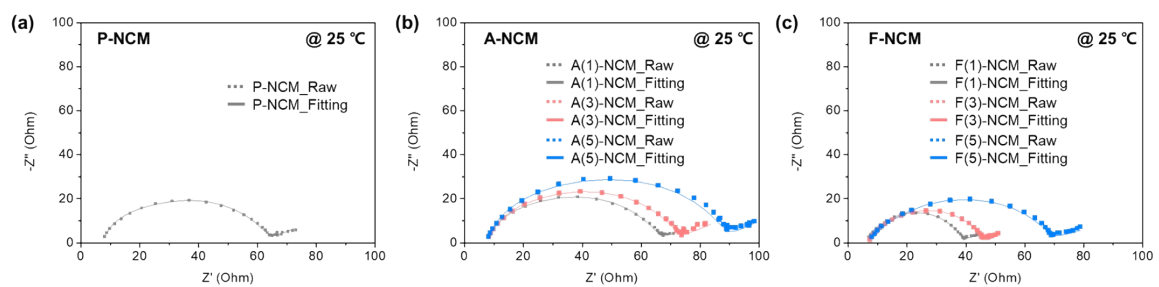

**Fig. S4** Nyquist plots of P-NCM, A-NCM and F-NCM, presented with fitted curves.

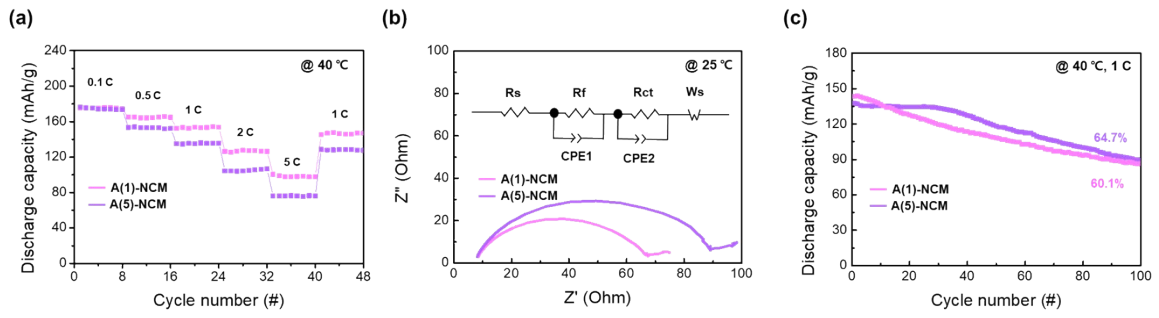

**Fig. S5** (a) Rate capability, (b) Electrochemical impedance spectroscopy data, and (c) Cycling performance of A(1)-NCM, and A(5)-NCM.

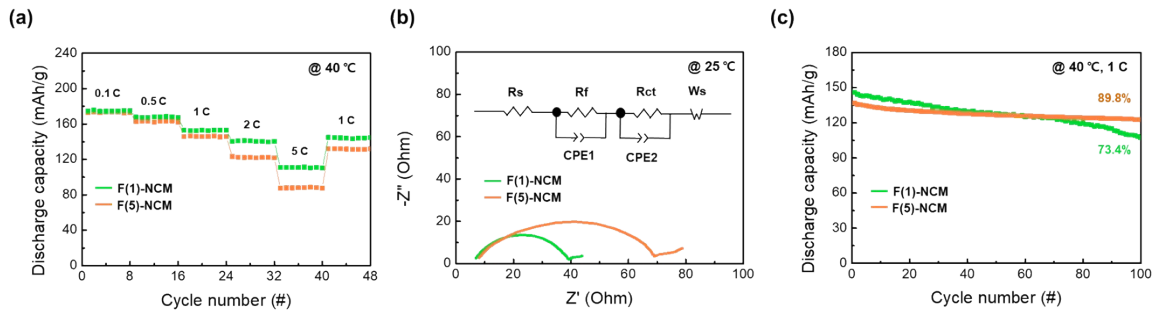

**Fig. S6** (a) Rate capability, (b) Electrochemical impedance spectroscopy data, and (c) Cycling performance of F(1)-NCM, and F(5)-NCM.



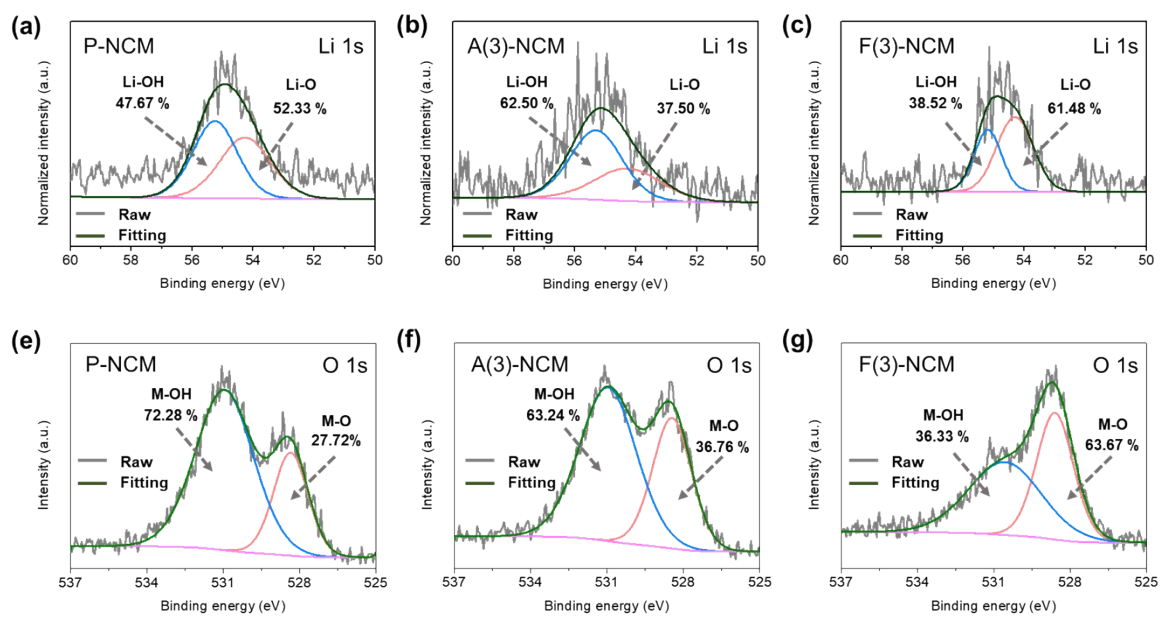

**Fig. S7** XPS data of P-NCM, A(3)-NCM, and F(3)-NCM for the (a-c) Li 1s and (d-f) O 1s core-level spectra after 100 cycles.

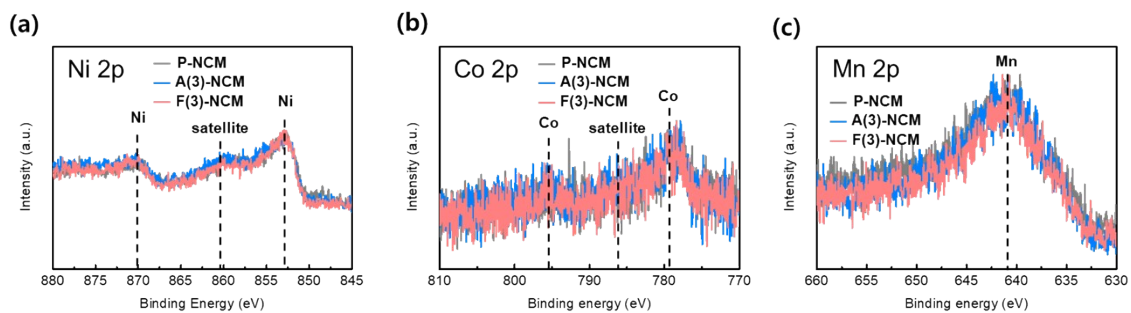

**Fig. S8** XPS analysis of P-NCM, A(3)-NCM, and F(3)-NCM for the (a) Ni 2p, (b) Co 2p and (c) Mn 2p after 100 cycles.

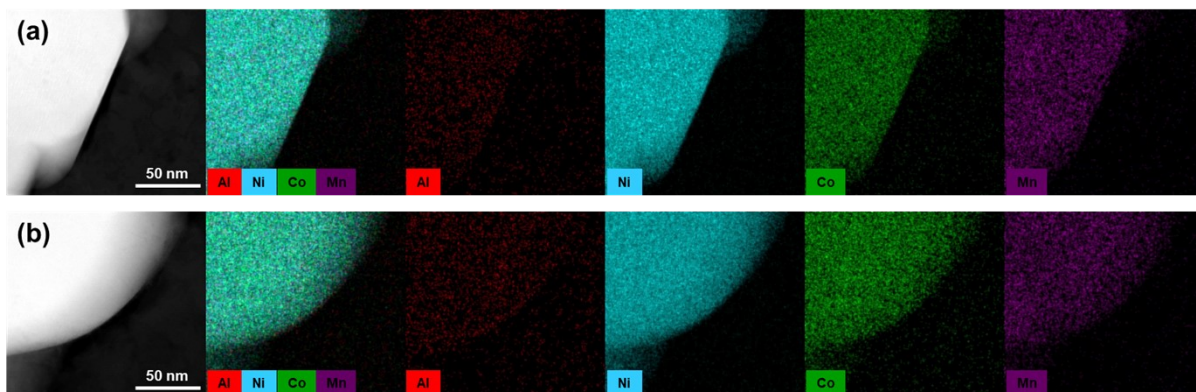

**Fig. S9** TEM images of (a) A(3)-NCM and (b) F(3)-NCM, EDS mapping for elements of A(3)-NCM and F(3)-NCM for Al (Red), Ni (Sky blue), Co (Green), and Mn (Purple).

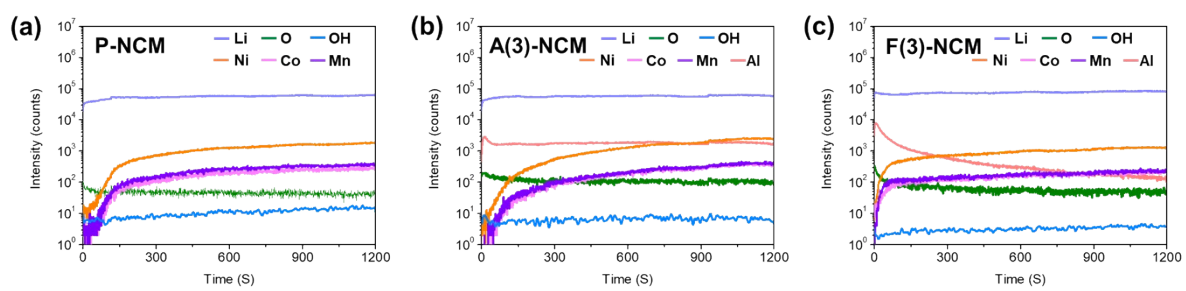

**Fig. S10** ToF-SIMS profiles of (A) P-NCM, (B) A(3)-NCM, and (C) F(3)-NCM after 100 cycles.
